# Supplementary material for: A new multicomponent reaction for direct synthesis of primary γ-nitroamides
Source: Royal Society of Chemistry journal article supplement (doi:10.1039/c6ra22141f), 2016-01-01
Supplement: c6ra22141f1.pdf [file c6ra22141f1.pdf]

## Supplementary Information

A new multicomponent reaction for direct synthesis of Primary  $\gamma$ -Nitroamides.

Caroline R. Montes D'Oca,<sup>a</sup> Jessica C. da Silva,<sup>a</sup> Esthefani P. Guedes,<sup>a</sup> Marcelo G. Montes D'Oca,<sup>b</sup> Leonardo S. Santos,<sup>c</sup> Fabiane M. Natchigall,<sup>d</sup> and Dennis Russowsky.<sup>a\*</sup>

<sup>a</sup>Laboratório de Sínteses Orgânicas, Instituto de Química, Universidade Federal do Rio Grande do Sul, Av. Bento Gonçalves, 9500, Porto Alegre, RS, Brazil.

<sup>b</sup>Laboratório Kolbe de Síntese Orgânica, Escola de Química e Alimentos, Universidade Federal do Rio Grande, Av. Itália, Km 08, s/nº, Rio Grande, RS, Brazil.

<sup>c</sup>Laboratory of Asymmetric Synthesis, Chemistry Institute of Natural Resources Universidad de Talca, 2 Norte 685, Talca, Chile.

<sup>d</sup>Nanobiotechnology Division at University of Talca, Fraunhofer Chile Research Foundation, Center for Systems Biotechnology, PO Box 747, Talca, Chile.

### Contents

<sup>1</sup>H NMR and <sup>13</sup>C NMR of  $\gamma$ -nitroamides **5a-h**

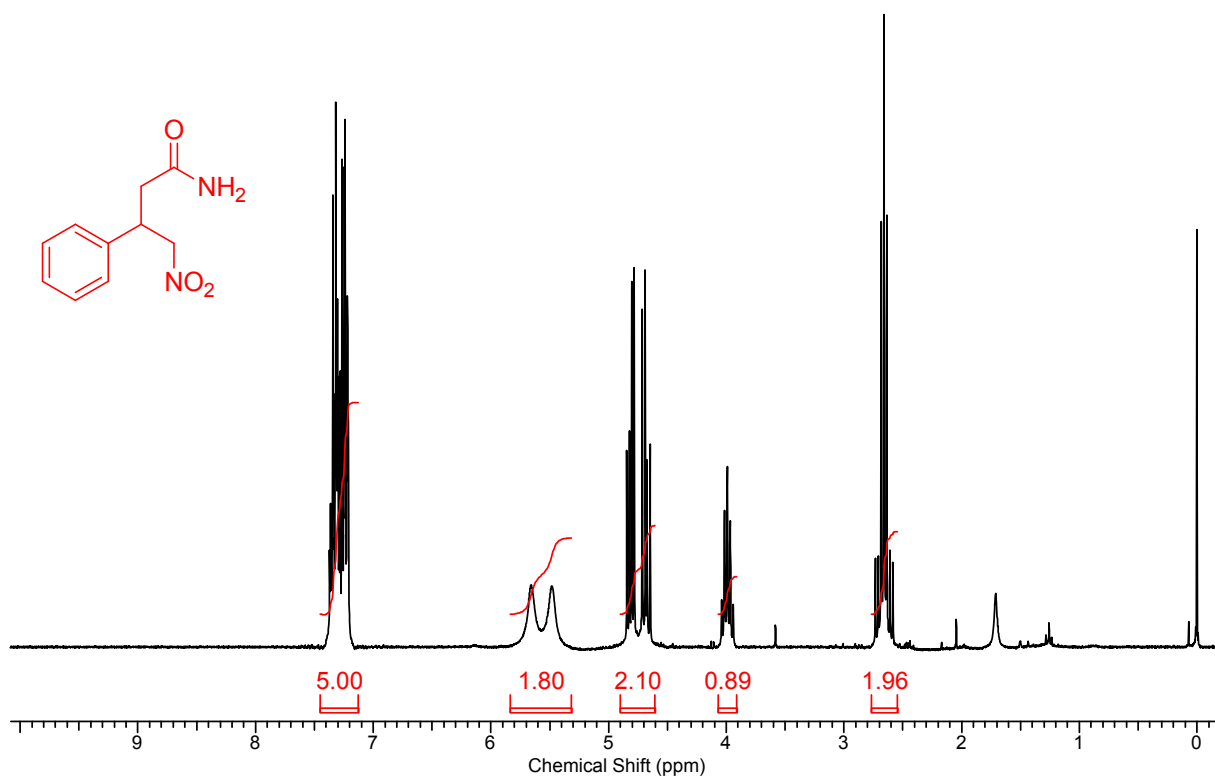

NMR  $^1\text{H}$  (300 MHz,  $\text{CDCl}_3$ ) of  $\gamma$ -nitroamide **5a**

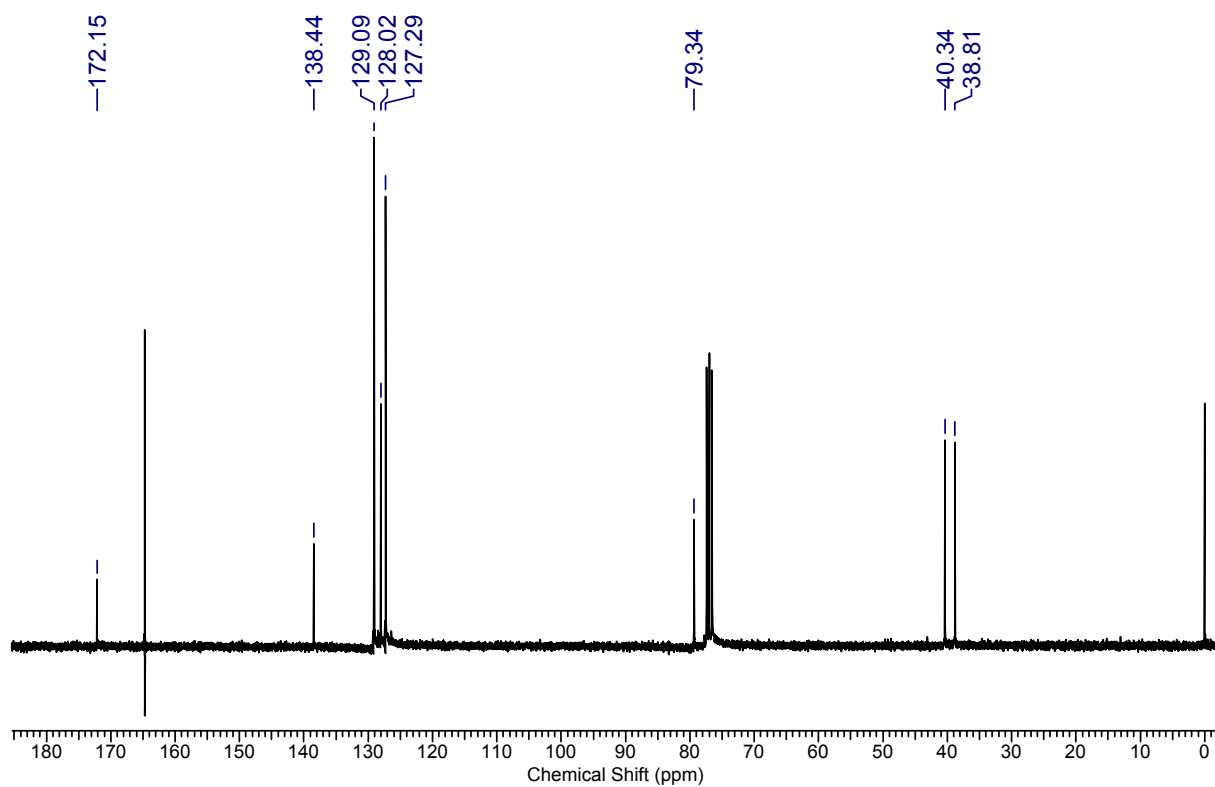

NMR  $^{13}\text{C}$  (75 MHz,  $\text{CDCl}_3$ ) of  $\gamma$ -nitroamide **5a**

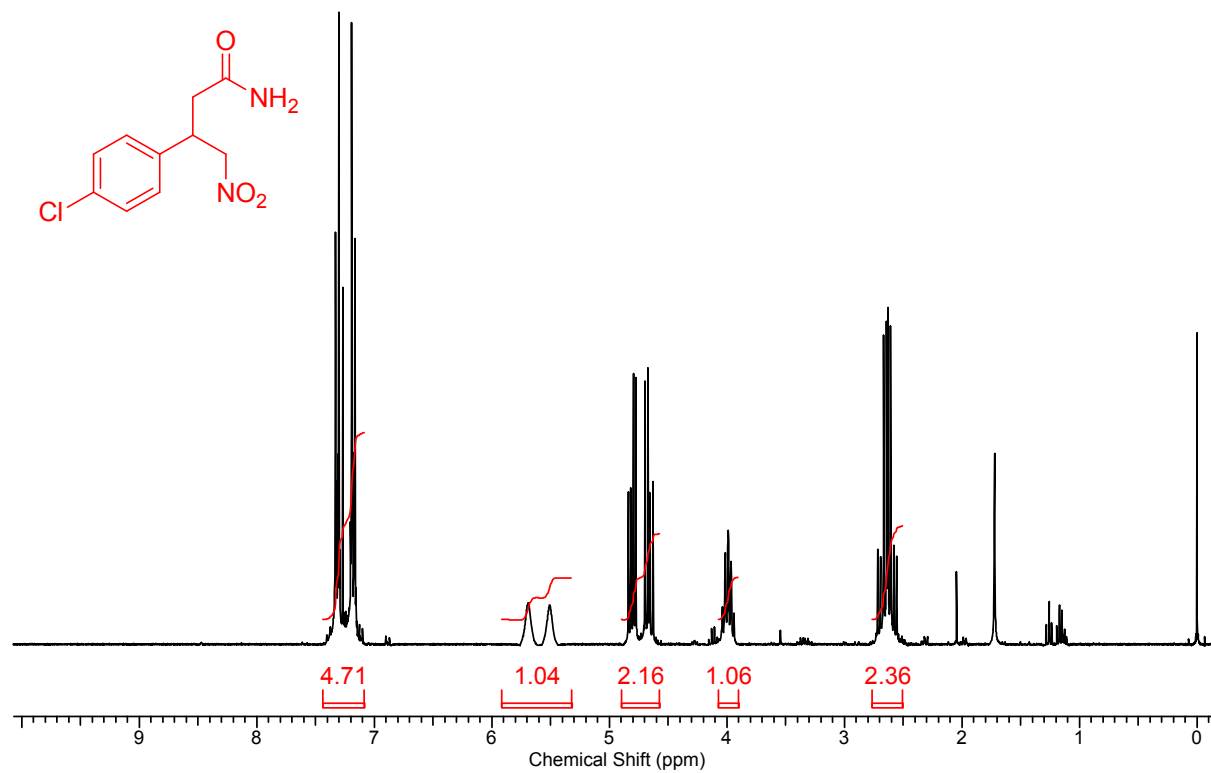

NMR  $^1\text{H}$  (300 MHz,  $\text{CDCl}_3$ ) of  $\gamma$ -nitroamide **5b**

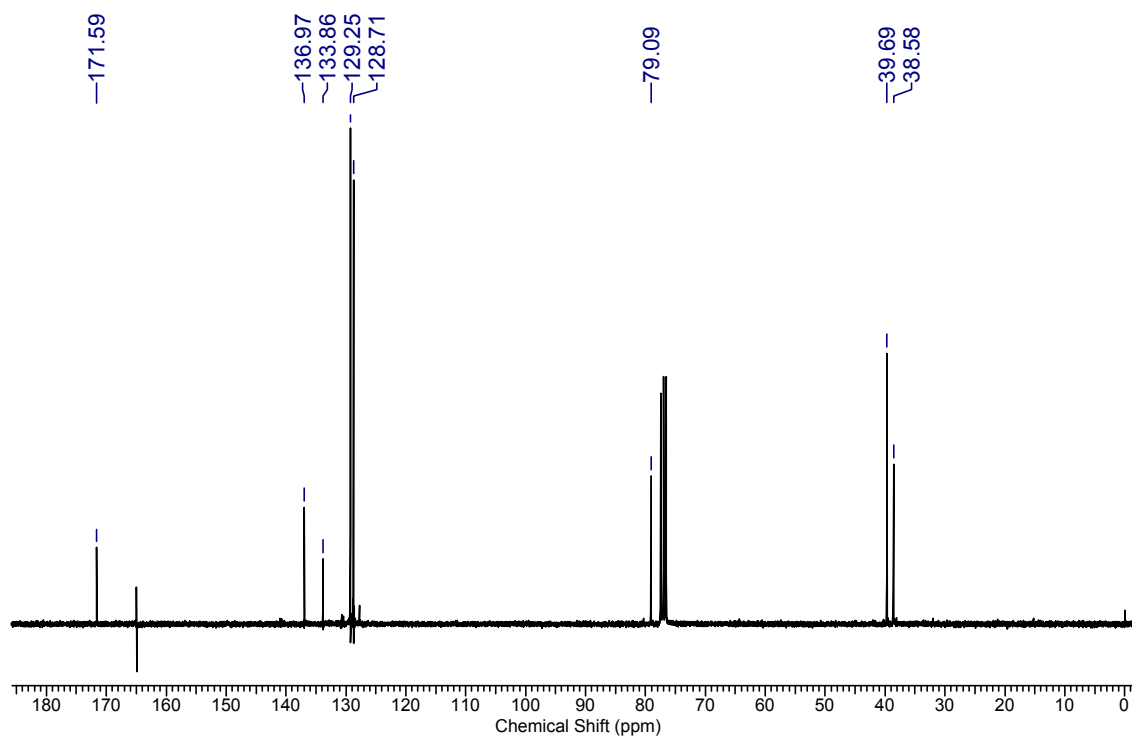

NMR  $^{13}\text{C}$  (75 MHz,  $\text{CDCl}_3$ ) of  $\gamma$ -nitroamide **5b**

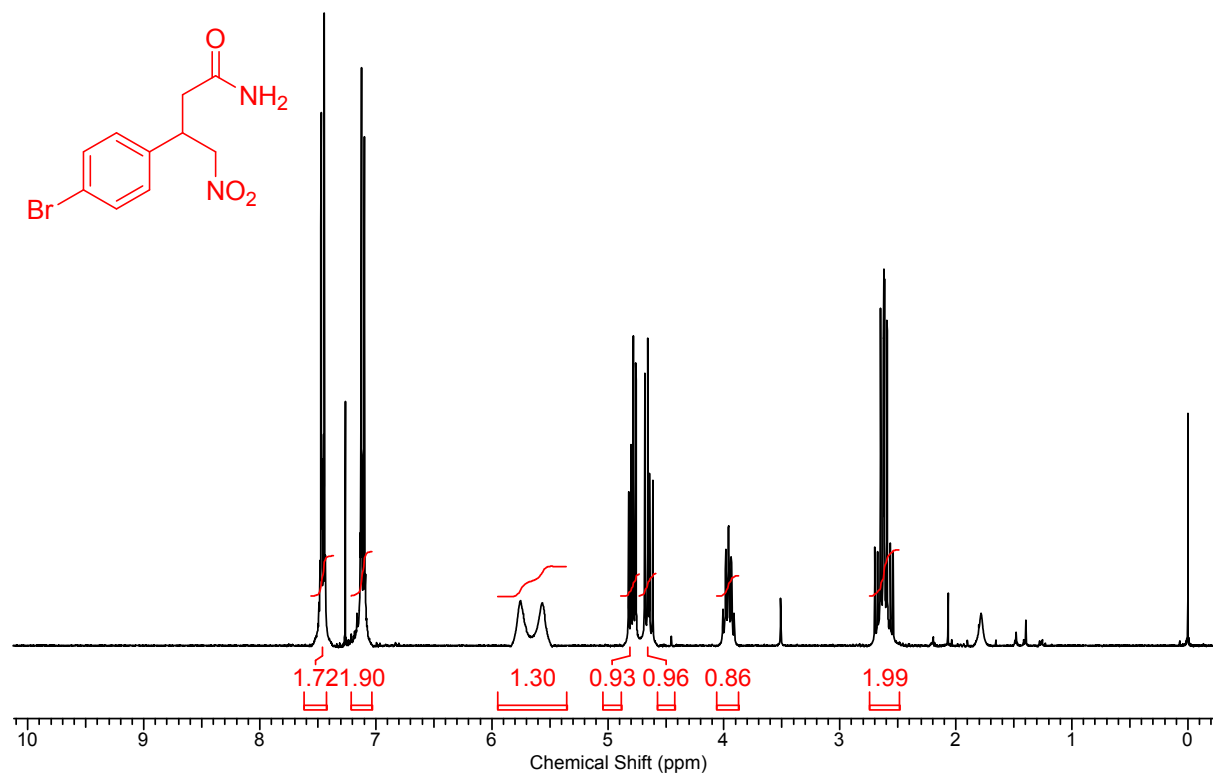

NMR  $^1\text{H}$  (300 MHz,  $\text{CDCl}_3$ ) of  $\gamma$ -nitroamide **5c**

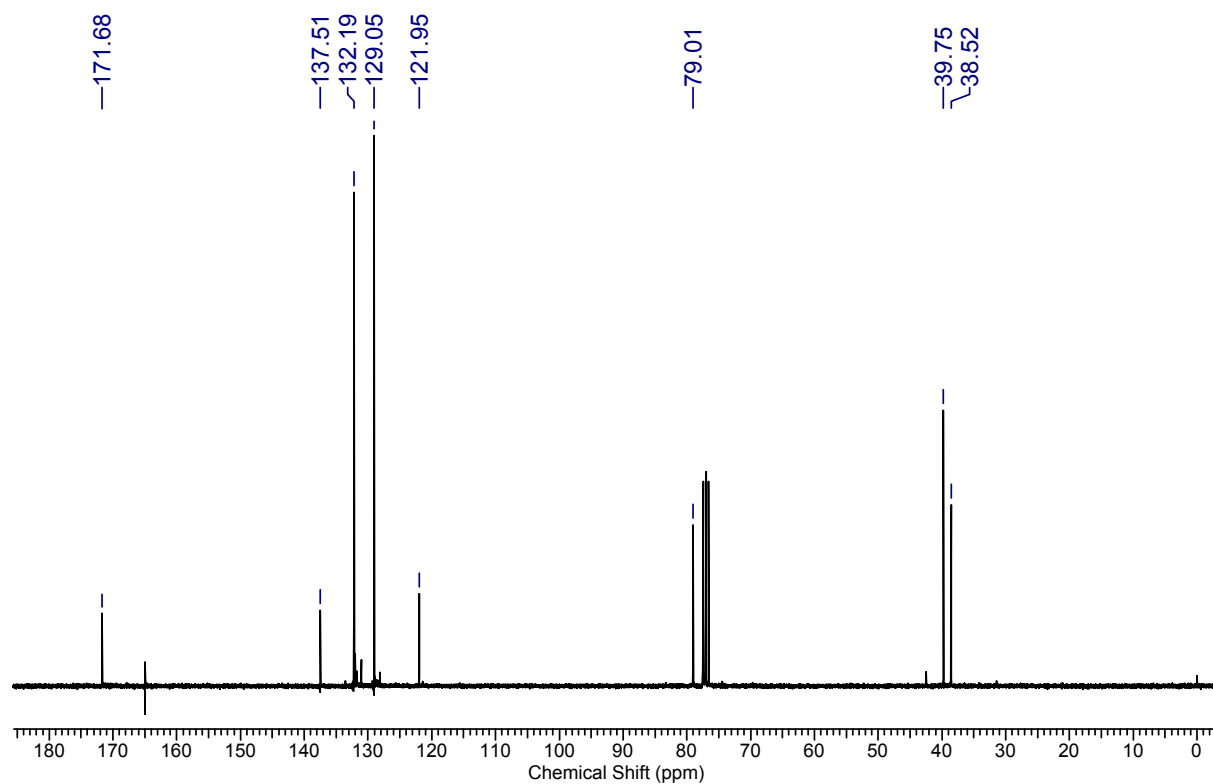

NMR  $^{13}\text{C}$  (75 MHz,  $\text{CDCl}_3$ ) of  $\gamma$ -nitroamide **5c**

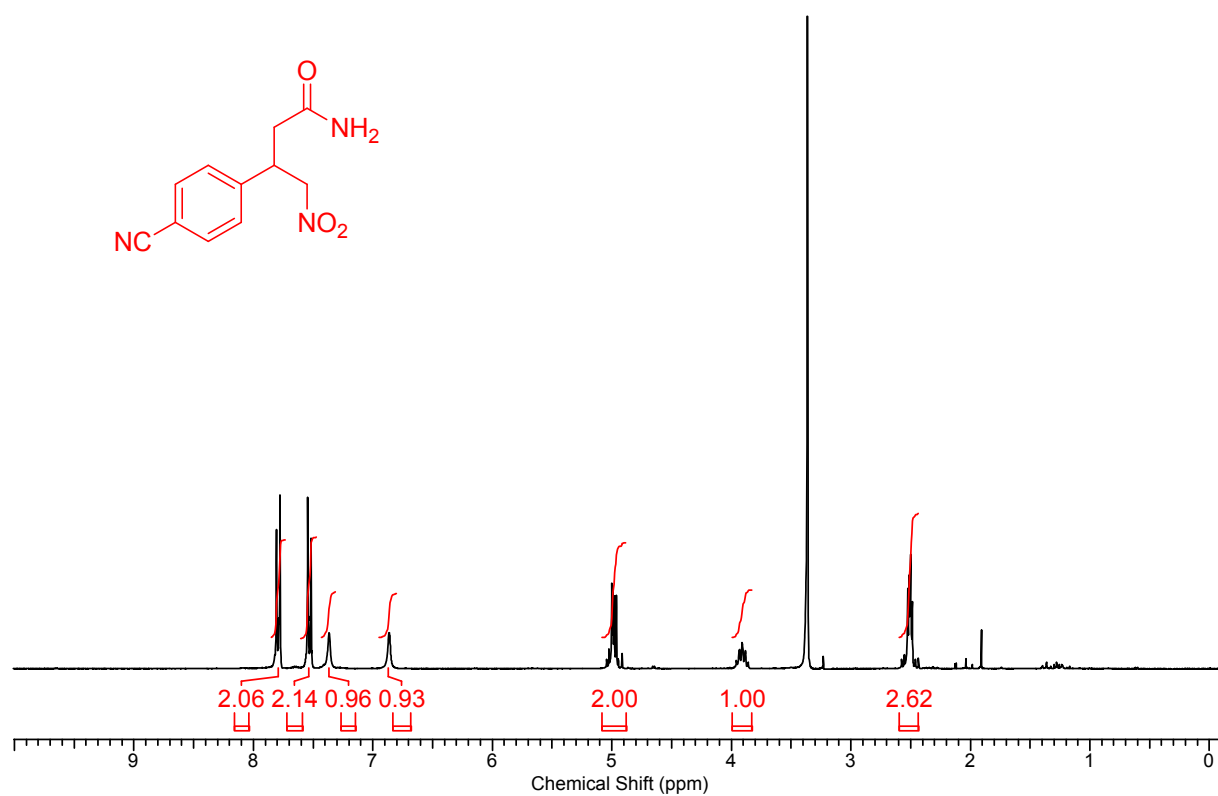

NMR  $^1\text{H}$  (300 MHz,  $\text{DMSO-}d_6$ ) of  $\gamma$ -nitroamide **5d**

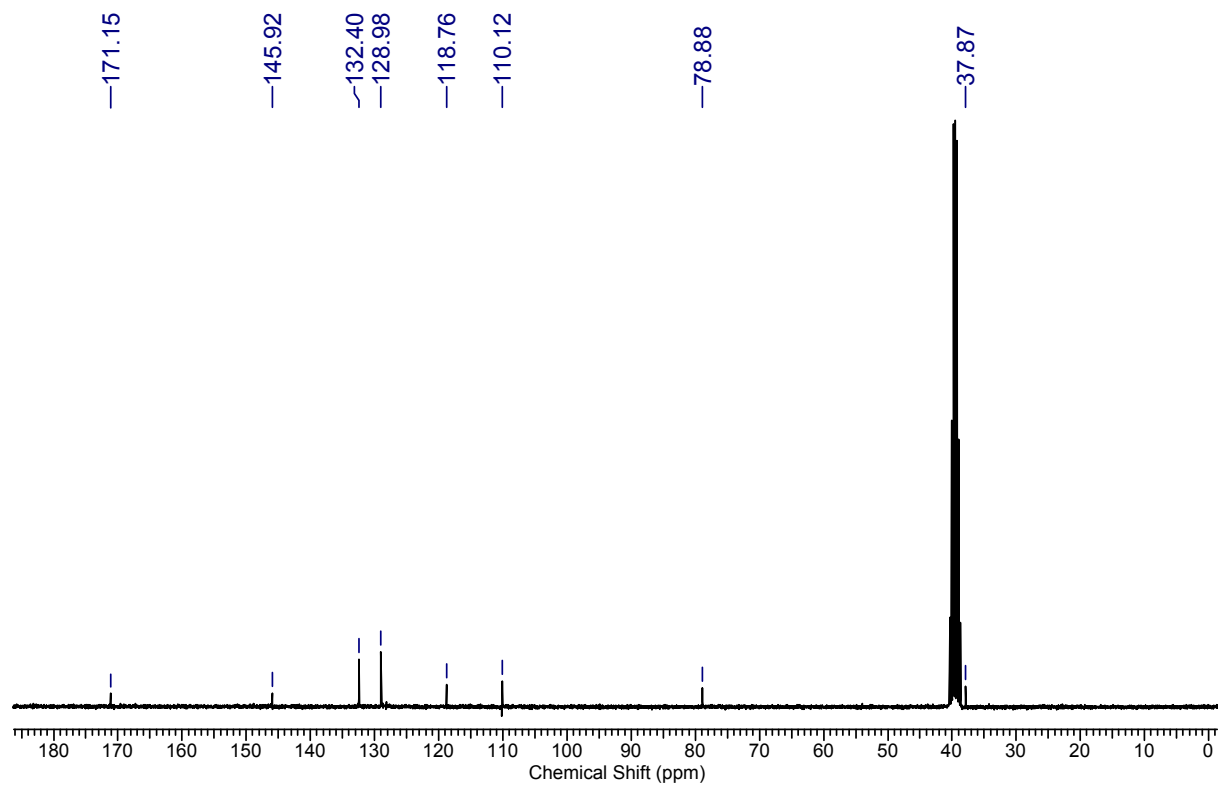

NMR  $^{13}\text{C}$  (75 MHz,  $\text{DMSO-}d_6$ ) of  $\gamma$ -nitroamide **5d**

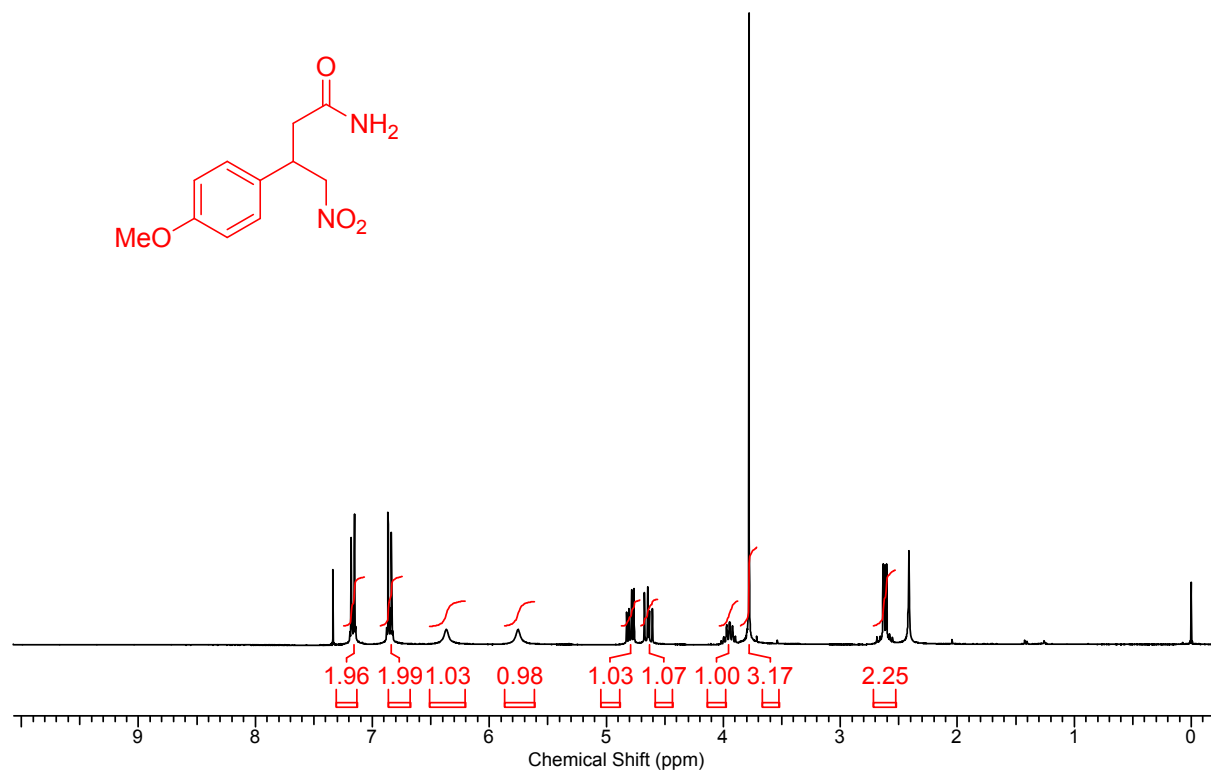

NMR  $^1\text{H}$  (300 MHz,  $\text{CDCl}_3$ ) of  $\gamma$ -nitroamide **5e**

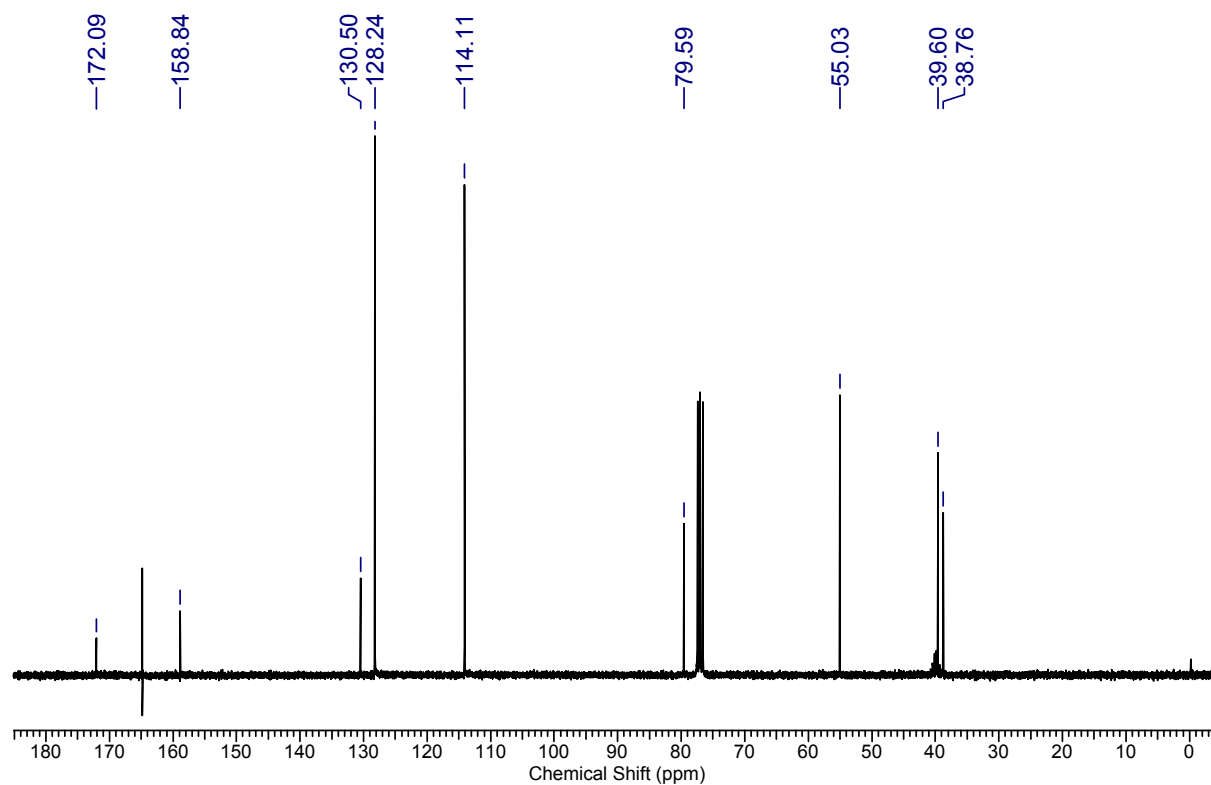

NMR  $^{13}\text{C}$  (75 MHz,  $\text{CDCl}_3$ ) of  $\gamma$ -nitroamide **5e**

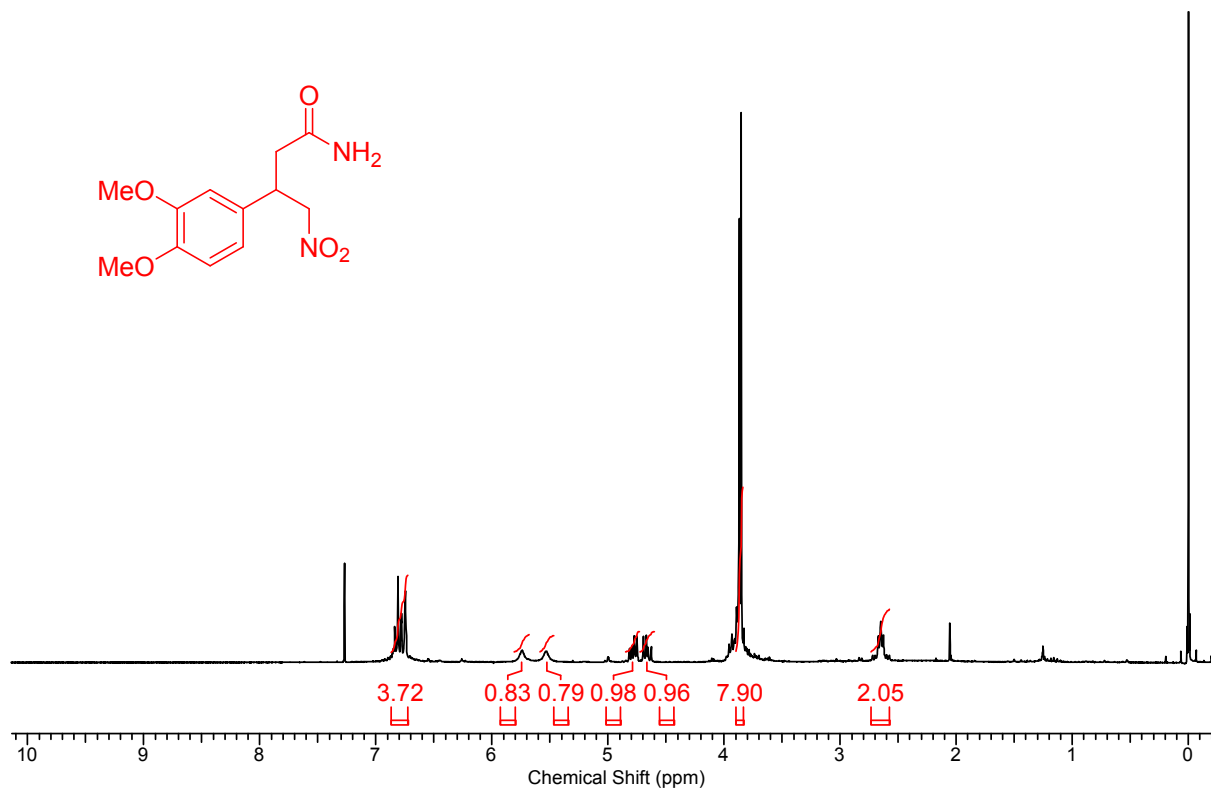

NMR  $^1\text{H}$  (300 MHz,  $\text{CDCl}_3$ ) of  $\gamma$ -nitroamide **5f**

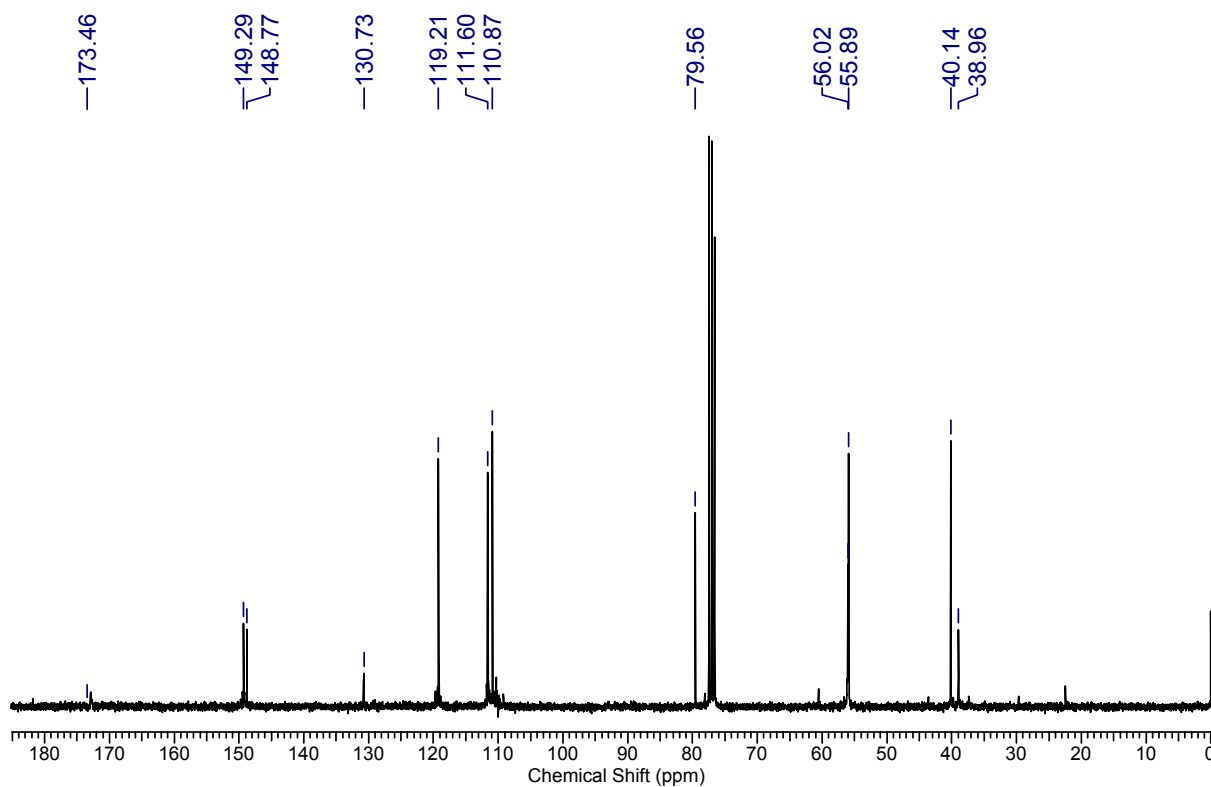

NMR  $^{13}\text{C}$  (75 MHz,  $\text{CDCl}_3$ ) of  $\gamma$ -nitroamide **5f**

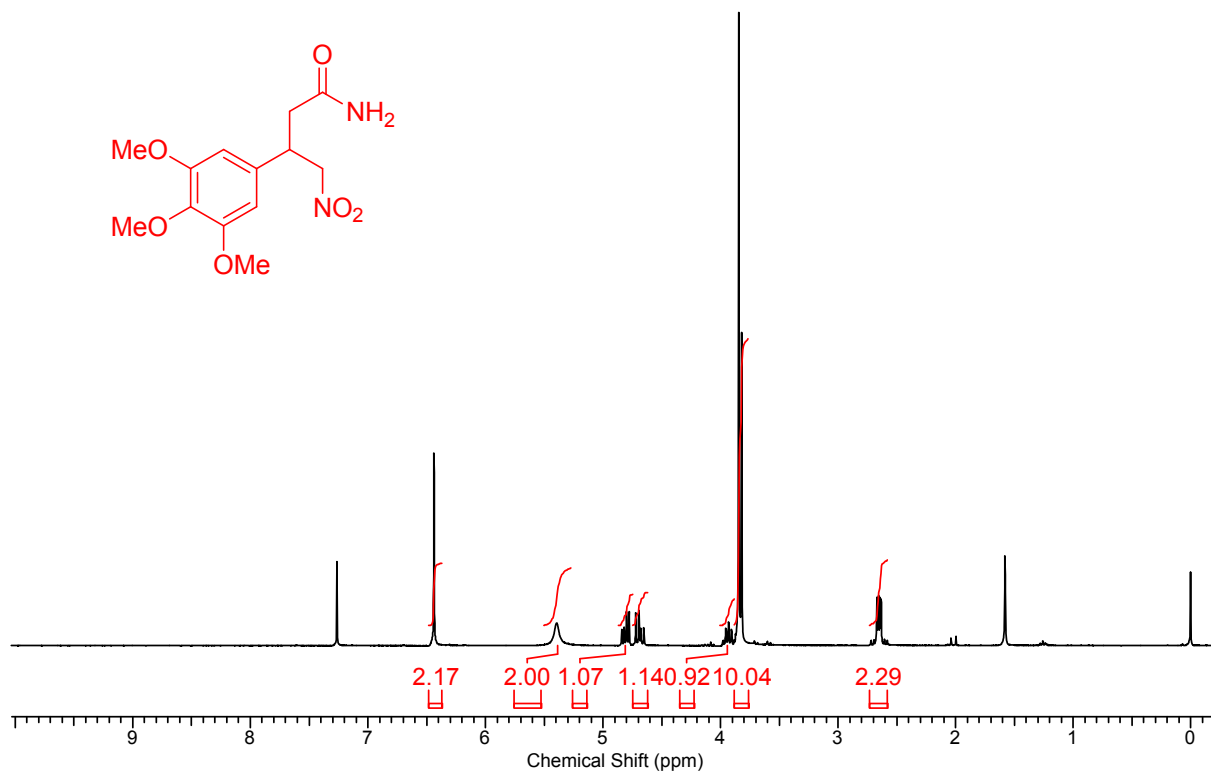

NMR  $^1\text{H}$  (300 MHz,  $\text{CDCl}_3$ ) of  $\gamma$ -nitroamide **5g**

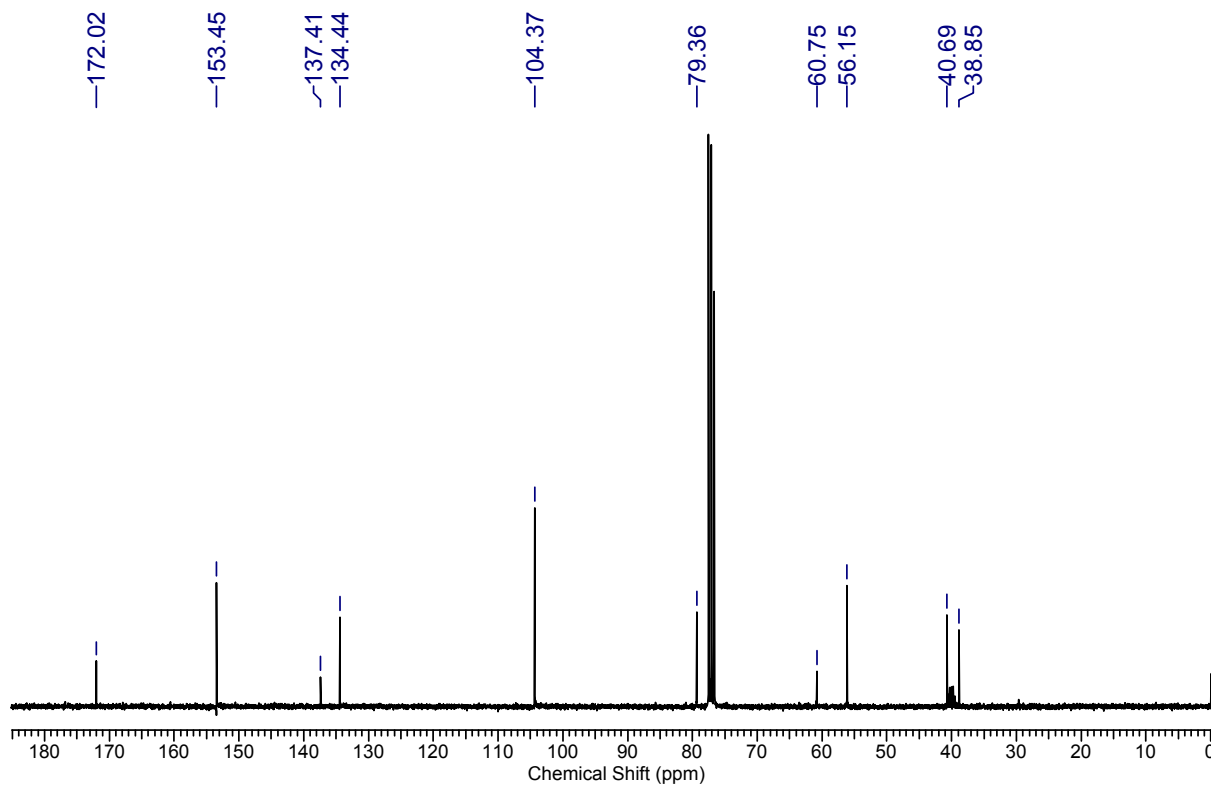

NMR  $^{13}\text{C}$  (75 MHz,  $\text{CDCl}_3$ ) of  $\gamma$ -nitroamide **5g**



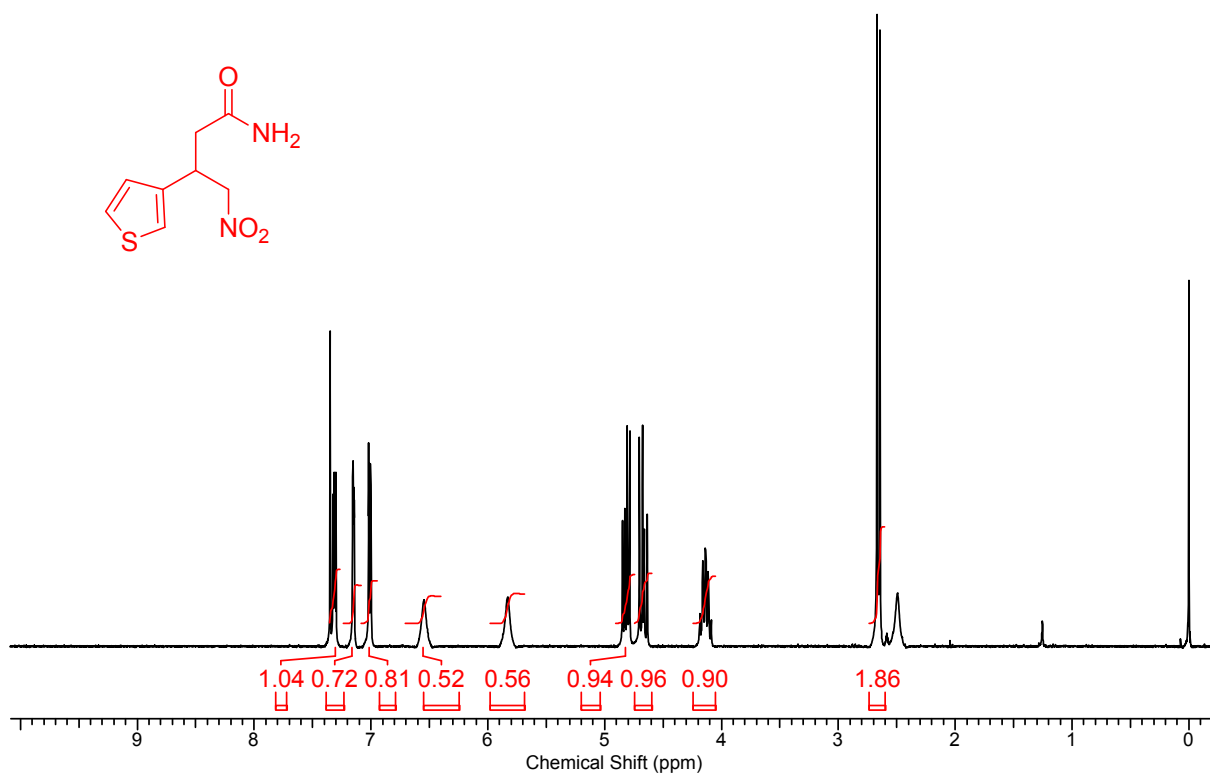

NMR <sup>1</sup>H (300 MHz, CDCl<sub>3</sub>) of  $\gamma$ -nitroamide **5h**

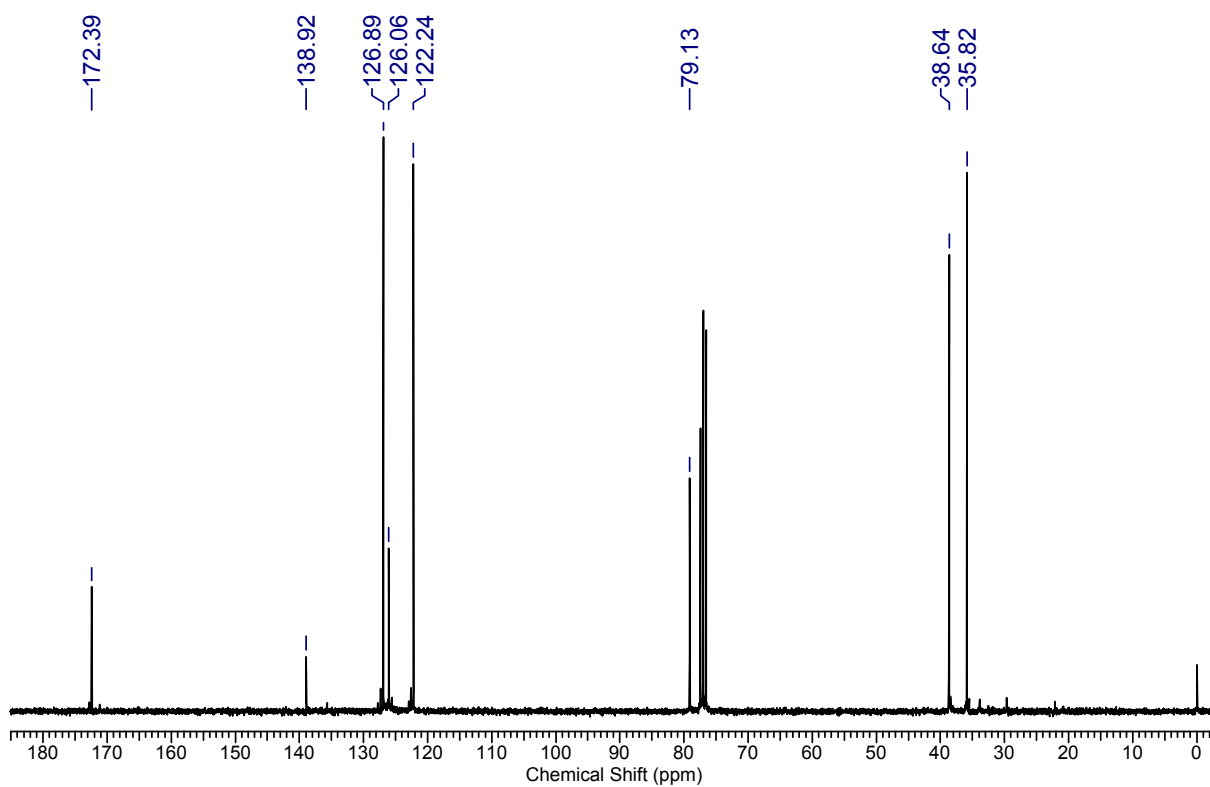

NMR <sup>13</sup>C (75 MHz, CDCl<sub>3</sub>) of  $\gamma$ -nitroamide **5h**

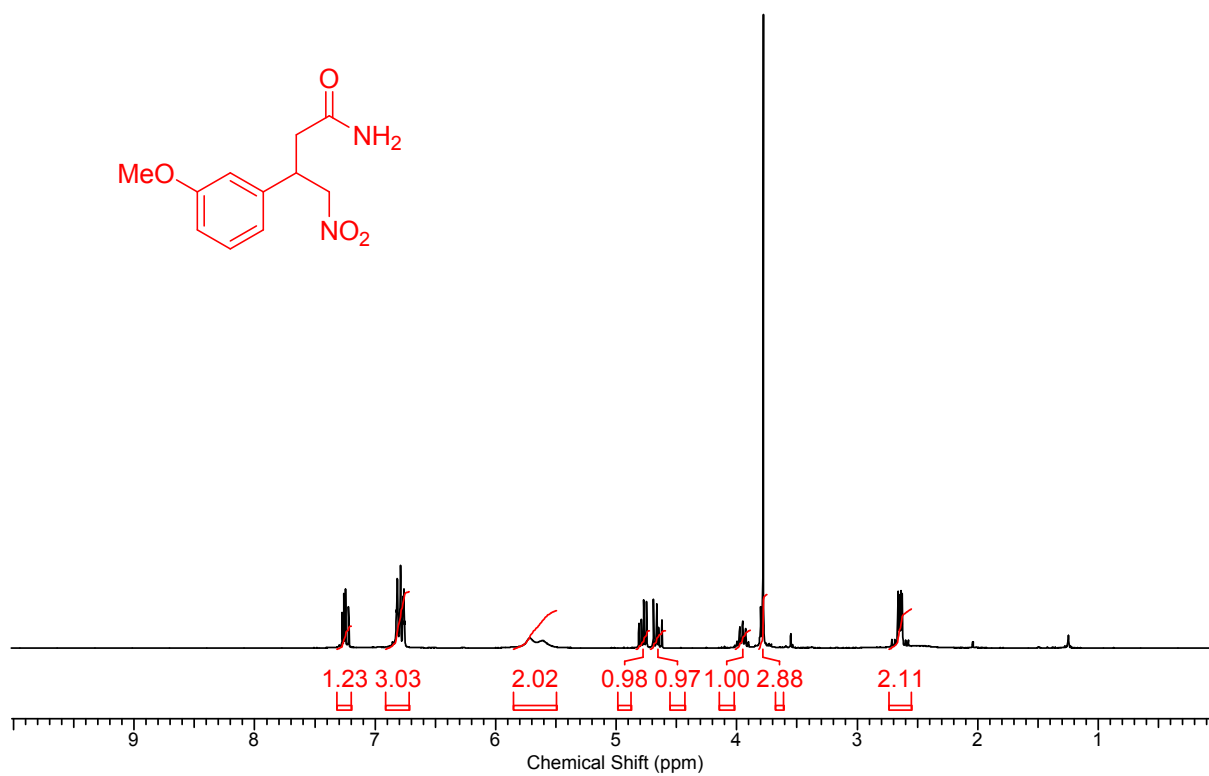

NMR  $^1\text{H}$  (300 MHz,  $\text{CDCl}_3$ ) of  $\gamma$ -nitroamide **5i**

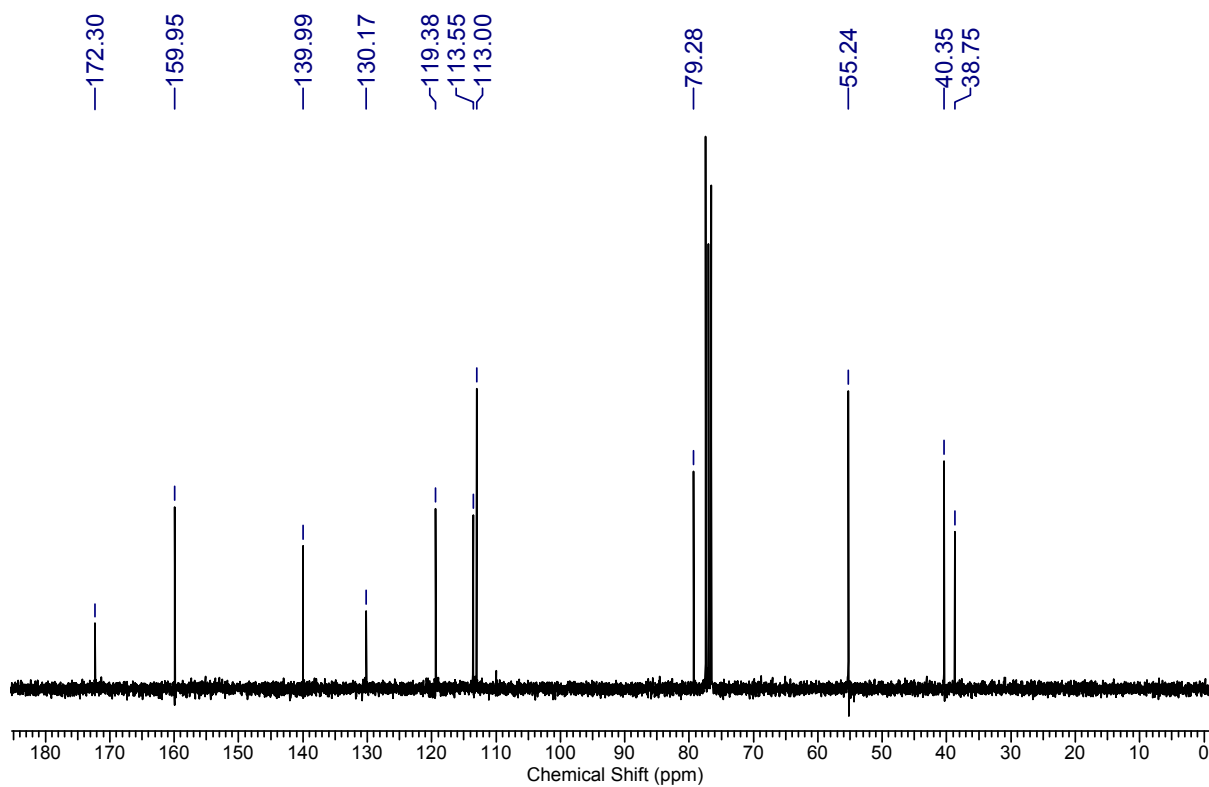

NMR  $^{13}\text{C}$  (75 MHz,  $\text{CDCl}_3$ ) of  $\gamma$ -nitroamide **5i**

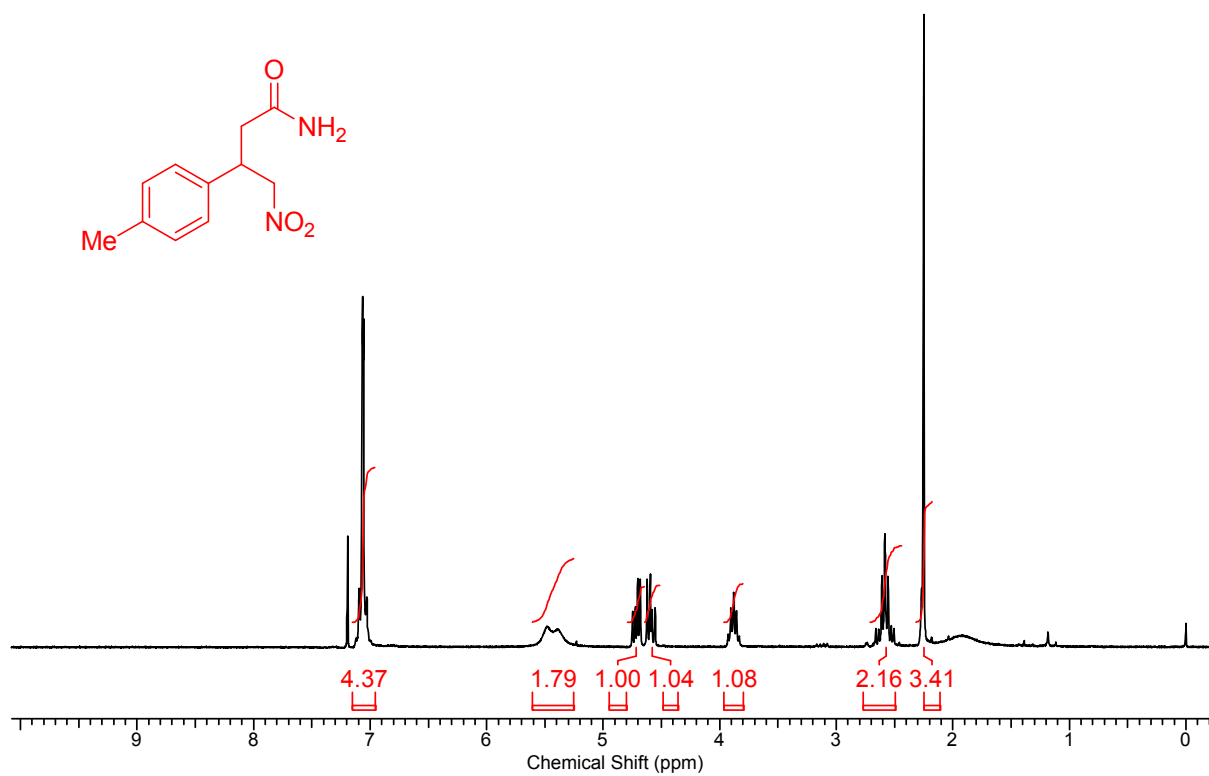

NMR  $^1\text{H}$  (300 MHz,  $\text{CDCl}_3$ ) of  $\gamma$ -nitroamide **5j**

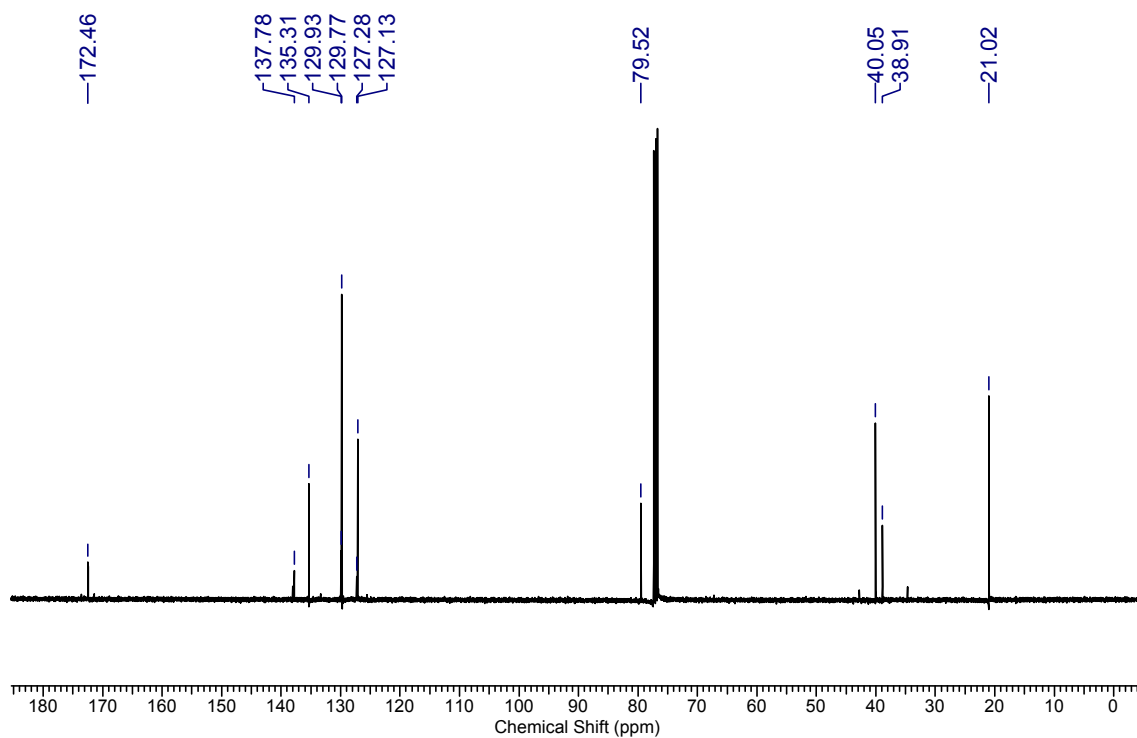

NMR  $^{13}\text{C}$  (75 MHz,  $\text{CDCl}_3$ ) of  $\gamma$ -nitroamide **5j**

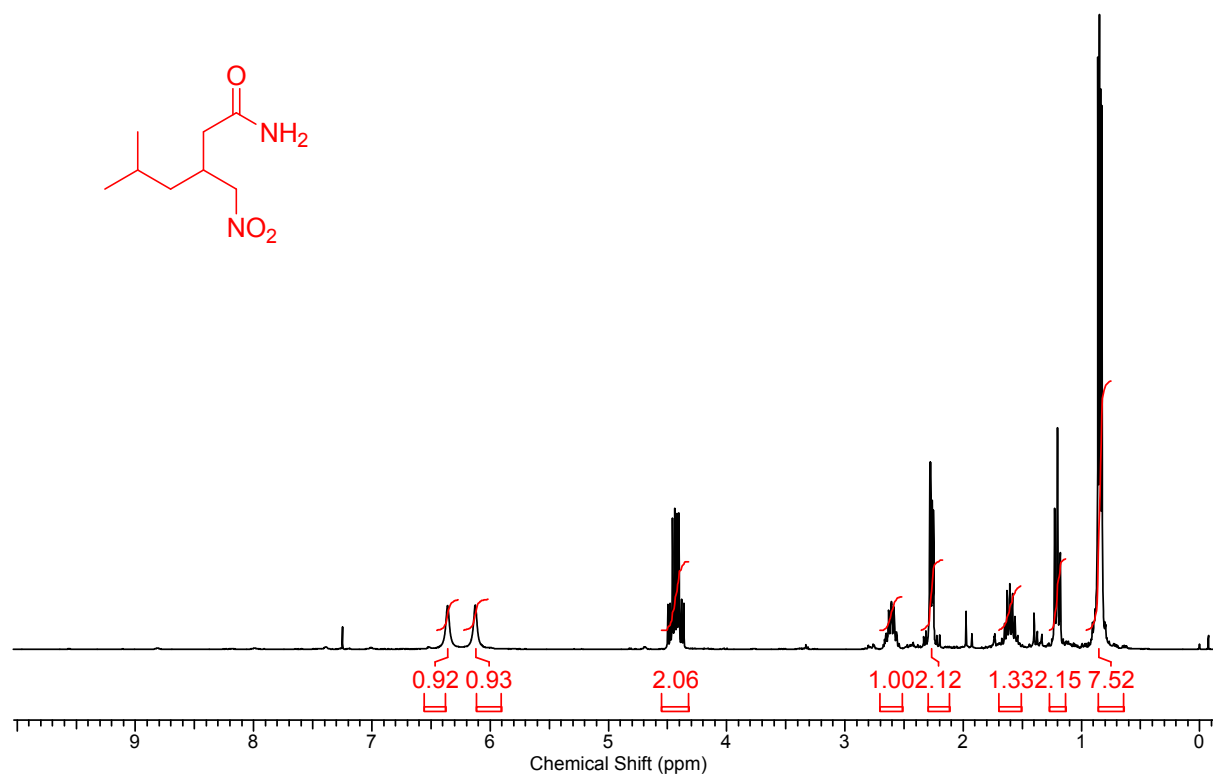

NMR  $^1\text{H}$  (300 MHz,  $\text{CDCl}_3$ ) of  $\gamma$ -nitroamide **5k**

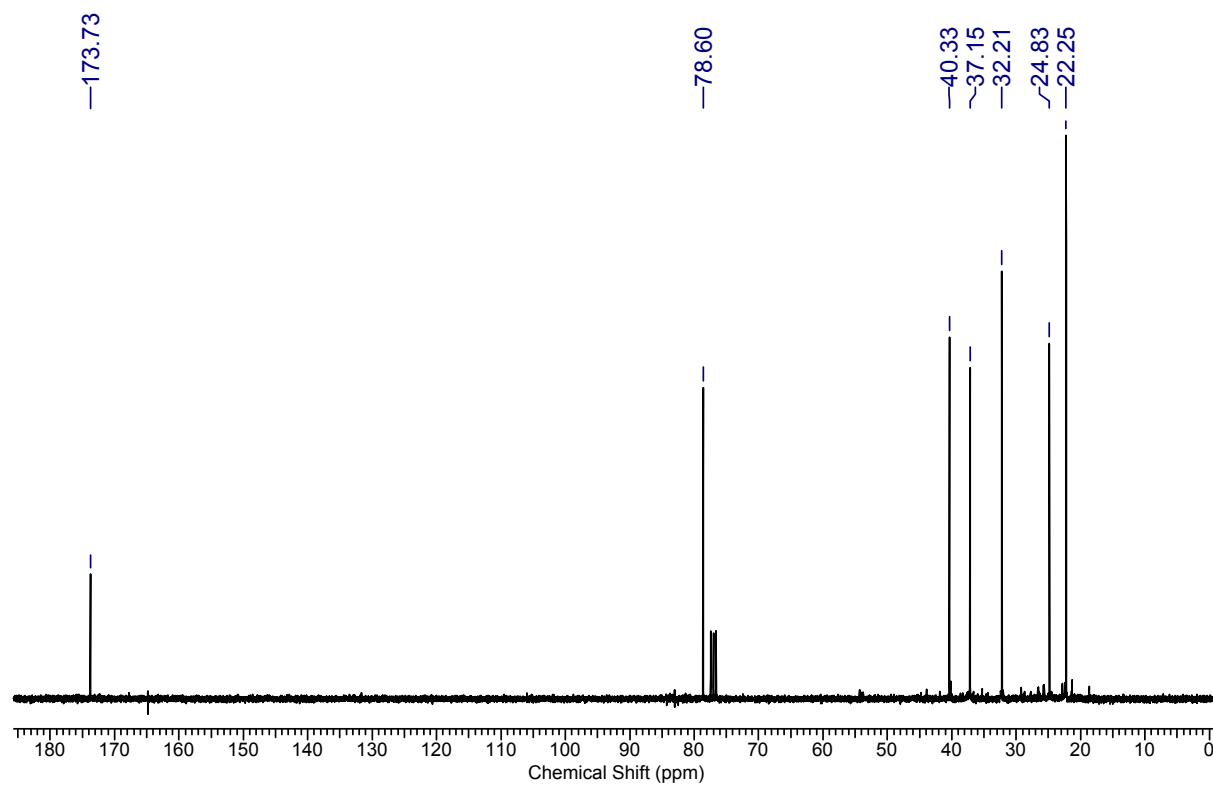

NMR  $^{13}\text{C}$  (75 MHz,  $\text{CDCl}_3$ ) of  $\gamma$ -nitroamide **5k**

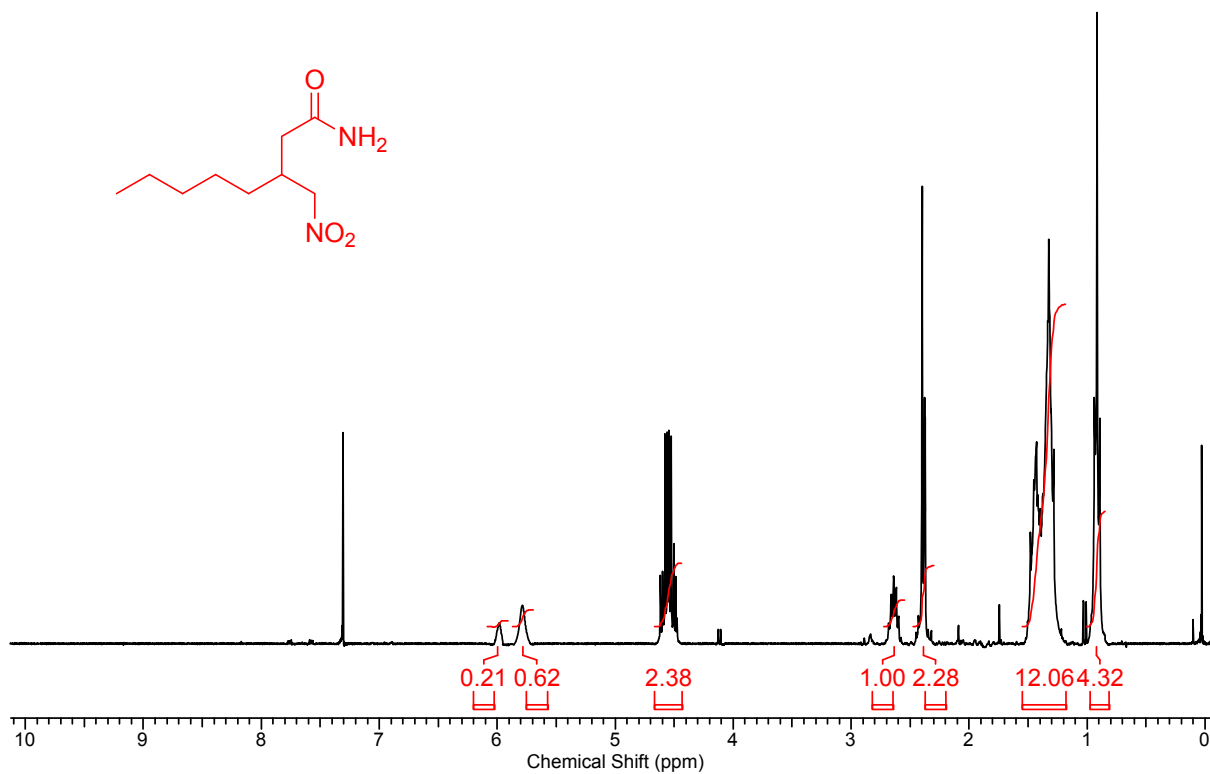

NMR  $^1\text{H}$  (300 MHz,  $\text{CDCl}_3$ ) of  $\gamma$ -nitroamide **51**

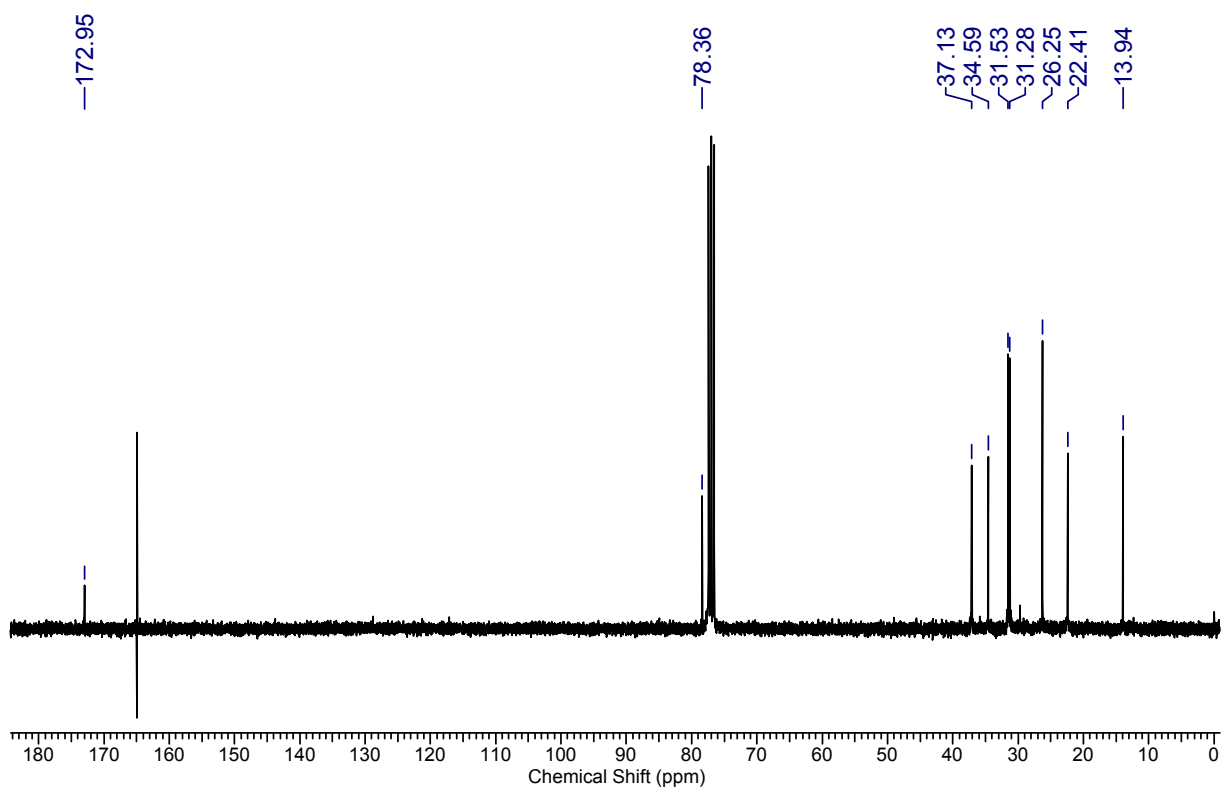

NMR  $^{13}\text{C}$  (75 MHz,  $\text{CDCl}_3$ ) of  $\gamma$ -nitroamide **51**
